# Supplementary material for: Characterization of the binding pattern of human aquaporin-4 autoantibodies in patients with neuromyelitis optica spectrum disorders
Source: PubMed Central journal article supplement (PMC4930584; doi:10.1186/s12974-016-0642-3), 2016-07-01
Supplement: 12974_2016_642_MOESM1_ESM.pdf [file 12974_2016_642_MOESM1_ESM.pdf]

**Additional File 1**

Primer for mutagenesis of human AQP4-M23 isoform.

|                                                                 |                                                                                                                                                                              |
|-----------------------------------------------------------------|------------------------------------------------------------------------------------------------------------------------------------------------------------------------------|
| Myc-Tag insertion- hAQP4<br>Loop A (position G <sup>60</sup> )  | Sense Primer: 5`-<br>TCAACTGGGGTGAGCAGAAGCTGATCTCTGAGGAAGA<br>CCTGGGAACAGAAAAGC-3'<br>Antisense Primer: 5`-<br>GCTTTTCTGTTCCCAGGTCTTCCTCAGAGATCAGCTTC<br>TGCTCACCCCAGTTGA-3' |
| Myc-Tag insertion- hAQP4<br>Loop C (position V <sup>141</sup> ) | Sense Primer: 5`-<br>CCTCCCAGTGTGGAGCAGAAGCTGATCTCTGAGGAAG<br>ACCTGGTGGGAGGCCTG-3'<br>Antisense Primer: 5`-<br>CAGGCCTCCCACCAGGTCTTCCTCAGAGATCAGCTTC<br>TGCTCCACACTGGGAGG-3' |
| Myc-Tag insertion- hAQP4<br>Loop E (position G <sup>225</sup> ) | Sense Primer: 5`-<br>GTTATCATGGGAGAGCAGAAGCTGATCTCTGAGGAAG<br>ACCTGAATTGGGAAAAC-3'<br>Antisense Primer: 5`-<br>GTTTTCCAATTCAGGTCTTCCTCAGAGATCAGCTTCT<br>GCTCTCCCATGATAAC-3'  |
| Delta A3 (LPVD → AAAA)<br>loop A                                | Sense Primer: 5`-<br>GAACAGAAAAGCCTGCAGCGGCCGCCATGGTTCTCAT<br>CTC-3'<br>Antisense Primer: 5`-<br>GAGATGAGAACCATGGCGGCCGCTGCAGGCTTTTCTG<br>TTC-3'                             |
| N153Q loop C:                                                   | Sense Primer: 5`-                                                                                                                                                            |

|               |                                                                                                                      |
|---------------|----------------------------------------------------------------------------------------------------------------------|
|               | ACCATGGTTCATGGACAACCTTACCGCTGGT-3'<br>Antisense Primer: 5`-<br>ACCAGCGGTAAGTTGTCCATGAACCATGGT-3'                     |
| H230G loop E: | Sense Primer: 5`-<br>GGGAAATTGGGAAAACGGTTGGATATATTG-3'<br>Antisense Primer: 5`-<br>CAATATATCCAACCGTTTTCCCAATTTCCC-3' |
