# Supplementary material for: Characterization of the binding pattern of human aquaporin-4 autoantibodies in patients with neuromyelitis optica spectrum disorders
Source: PubMed Central journal article supplement (PMC4930584; doi:10.1186/s12974-016-0642-3), 2016-07-01
Supplement: 12974_2016_642_MOESM3_ESM.pdf [file 12974_2016_642_MOESM3_ESM.pdf]

### Additional File 3

(A) Binding of AQP4 specific monoclonal rAbs to AQP4-M1 versus AQM4-M23 isoforms.

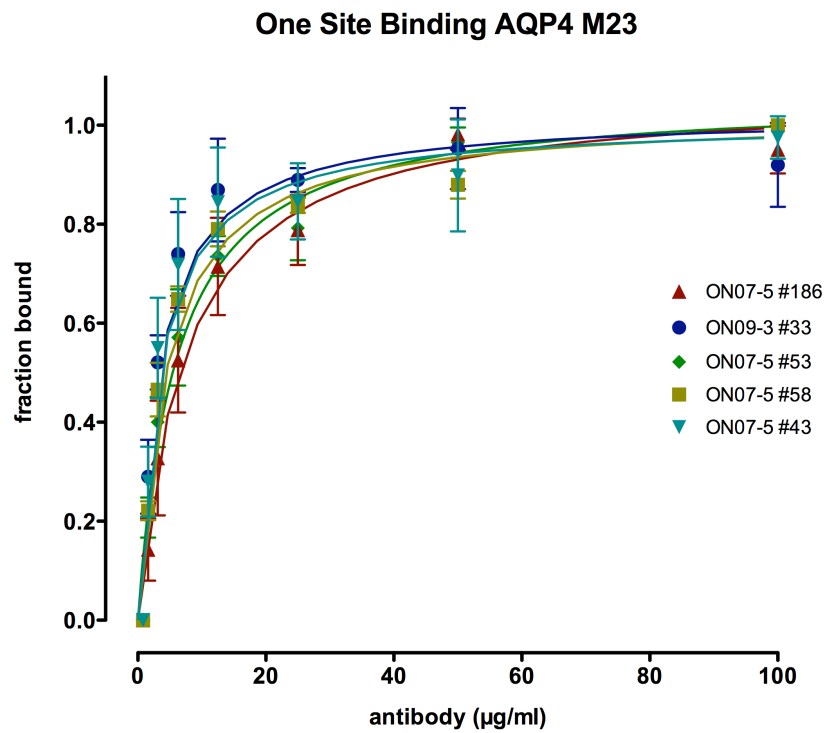

Binding curves for the 5 human recombinant AQP4-IgG antibodies provided by Dr. Jeffrey Bennerr (mean with standard deviation). Curves represent fits to single-site binding model.

(B) Heatmap of rAbs against AQP4-M23, AQP4-M1 and AQP4-M23 mutants.

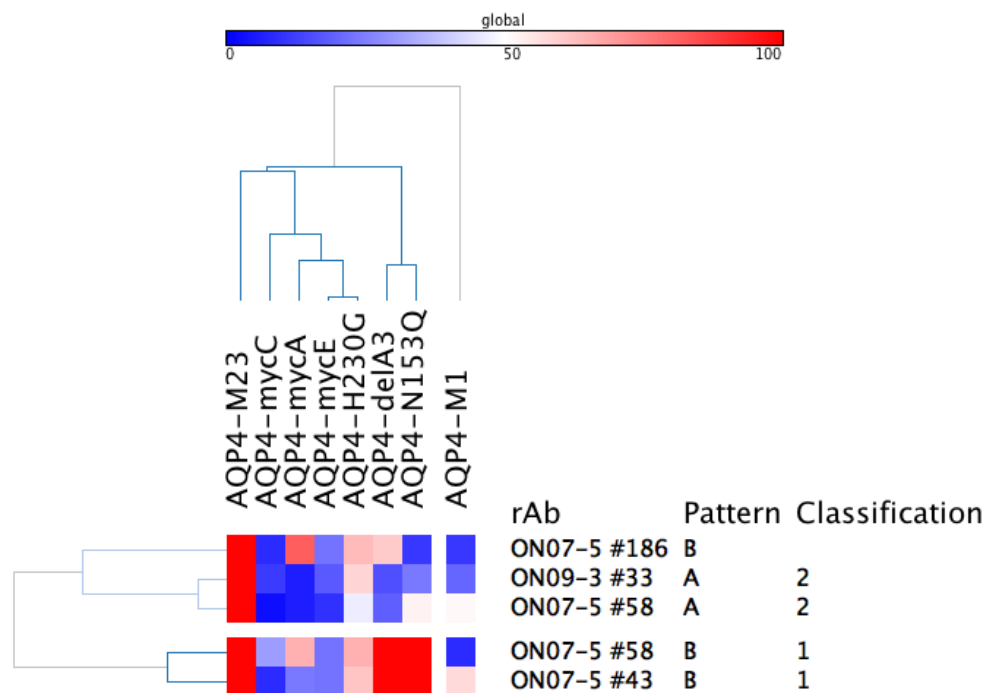

Heatmap of rAbs against AQP4-M23, AQP4-M1 and AQP4-M23 mutants (columns). Data are shown as percent binding of AQP4-M23. Values range from blue (0%) to white (50%) to red (100%). Columns were clustered according to their Pearson's correlation coefficients and rows were cluster according to their Euclidian distance (both complete linkage). Two major antibody binding patterns were identified, a loop-A dependent pattern A and an independent pattern B. These patterns are according to the classification described by Owens et al in 2015. The heatmap was generated using GENE-E matrix visualization and analysis software (<http://www.broadinstitute.org/cancer/software/GENE-E/index.html>).
