# Supplementary material for: Characterization of the binding pattern of human aquaporin-4 autoantibodies in patients with neuromyelitis optica spectrum disorders
Source: PubMed Central journal article supplement (PMC4930584; doi:10.1186/s12974-016-0642-3), 2016-07-01
Supplement: 12974_2016_642_MOESM4_ESM.pdf [file 12974_2016_642_MOESM4_ESM.pdf]

## Additional File 4

BN page characterization of AQP wildtype and mutant proteins.

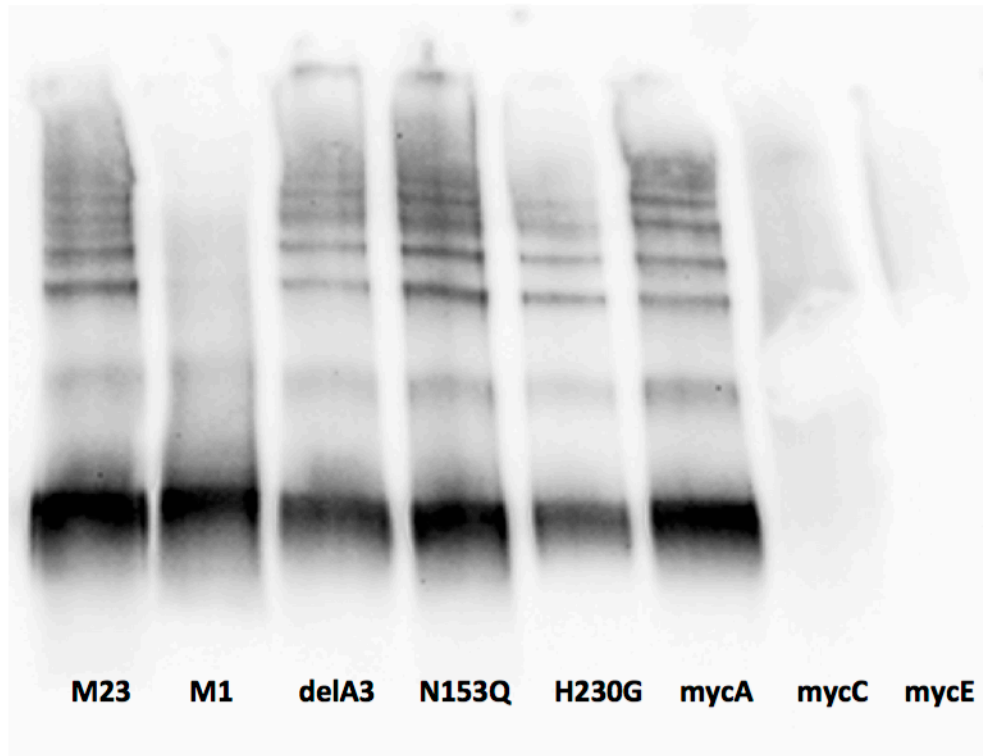

The formation of supramolecular OAPs was visualized by BN-PAGE showing the effects of extracellular loop mutations. AQP4-M23 as well as mutant constructs delA3, N153Q, H230G and mycA show the presence of large aggregates, whereas higher order arrays are absent in AQP4-M1 mycC and mycE mutant constructs.
